# Supplementary material for: The Encoding of Decision Difficulty and Movement Time in the Primate Premotor Cortex
Source: PubMed Central journal article supplement (PMC4640568; doi:10.1371/journal.pcbi.1004502), 2015-11-10

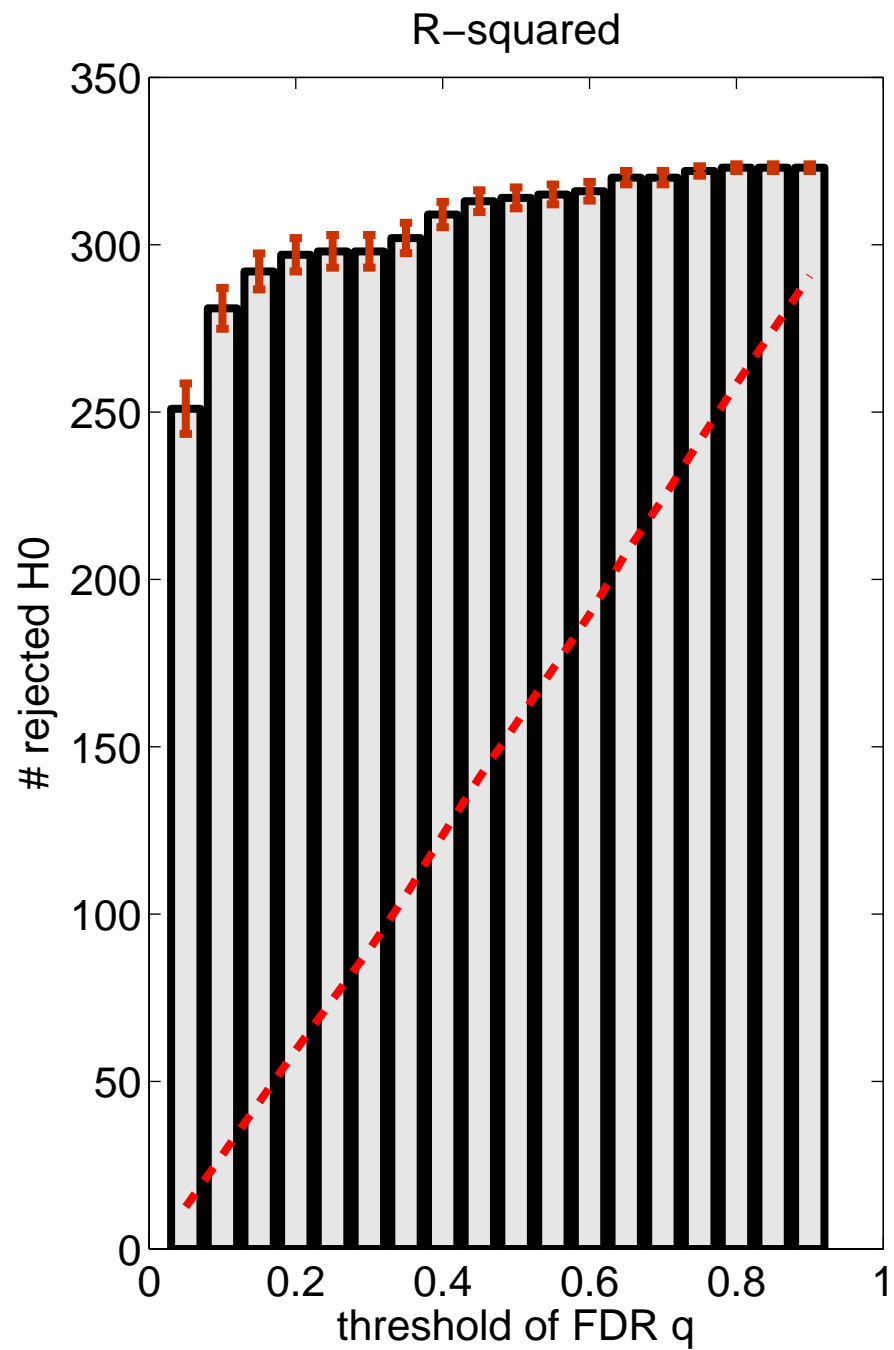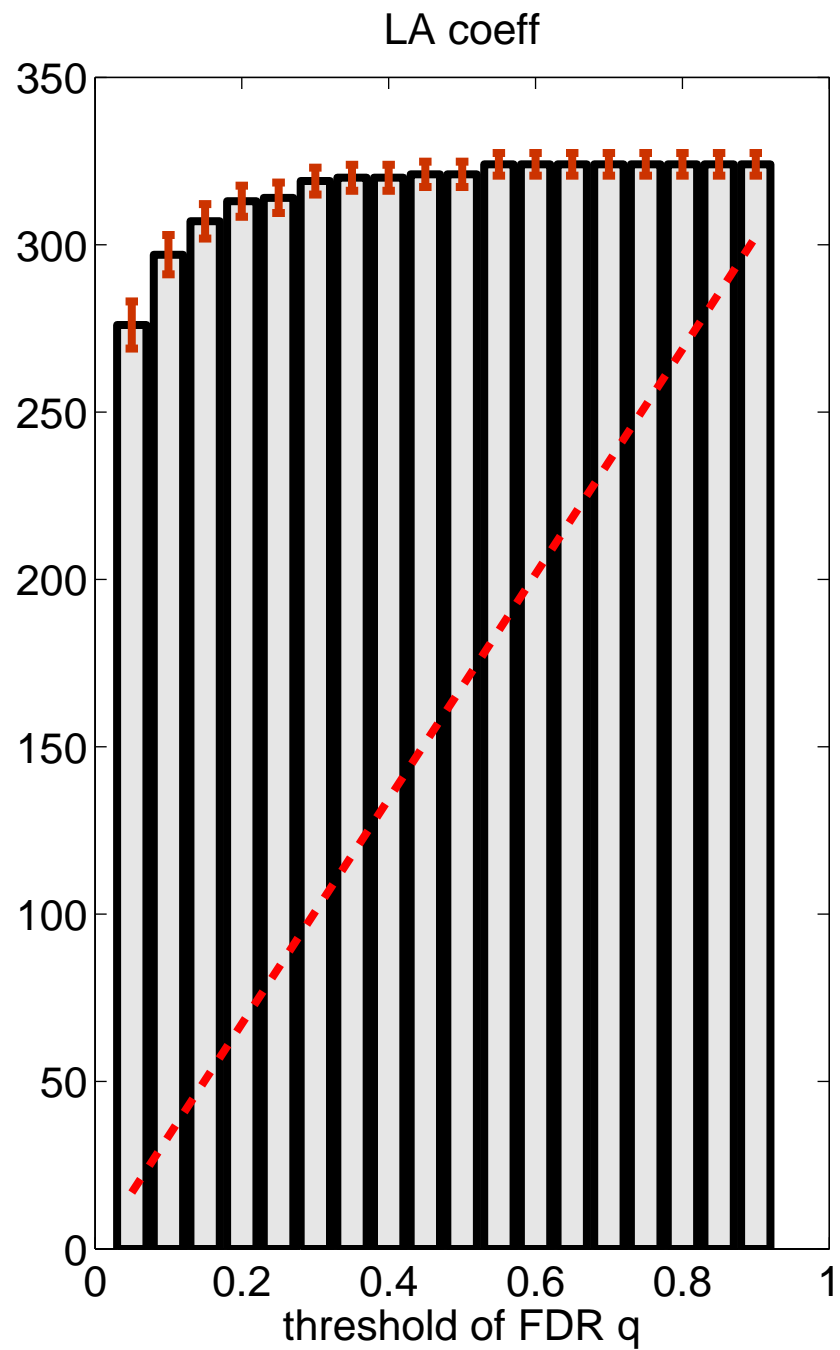

Supplement: pcbi.1004502.s005.pdf [file pcbi.1004502.s005.pdf]
